# Supplementary material for: Patient specific circulating tumor DNA fingerprints to monitor treatment response across multiple tumors
Source: J Transl Med. 2020 Aug 1;18:293. doi: 10.1186/s12967-020-02449-y (PMC7395971; doi:10.1186/s12967-020-02449-y)
Supplement: Supplementary file 3 — Additional file 3: Table S3. Acquired drug-related mutations in nine patients identified using a pre-designed ctDNA panel. [file 12967_2020_2449_MOESM3_ESM.xlsx]

## Sheet: Supplementary Table S3
Supplementary Table S3. Acquired drug-related mutations in nine patients identified using a pre-designed ctDNA panel
New mutation	Mutation frequency	Patient ID	Tumor type
KRAS c.183A>C p.Q61H	0.0086	P1499	Colorectal cancer
KRAS c.34G>T p.G12C	0.006	P2074	Colorectal cancer
KRAS c.34G>T p.G12C	0.0043	P2230	Colorectal cancer
KRAS c.38G>A p.G13D	0.0068	P2800	Colorectal cancer
KRAS c.37G>T p.G13C	0.0175	P2997	Colorectal cancer
KRAS c.183A>T p.Q61H	0.014	P3439	Colorectal cancer
NRAS c.182A>T p.Q61L	0.0098	P3439	Colorectal cancer
BRAF c.G1780A p.D594N	0.0069	P3439	Colorectal cancer
EGFR c.2369C>T p.T790M	0.0048	P0220	Lung adenocarcinoma
PIK3CA c.G1624A p.E542K	0.1235	P2842	Breast cancer
PIK3CA c.1634A>G p.E545G	0.0082	P4789	Cholangiocarcinoma
